# Supplementary figures and images for: Differential modification of the C-terminal tails of different α-tubulins and their importance for microtubule function in vivo
Source: eLife journal article supplement (doi:10.7554/elife.87125), 2023-06-22

SourceDataFIG. S1

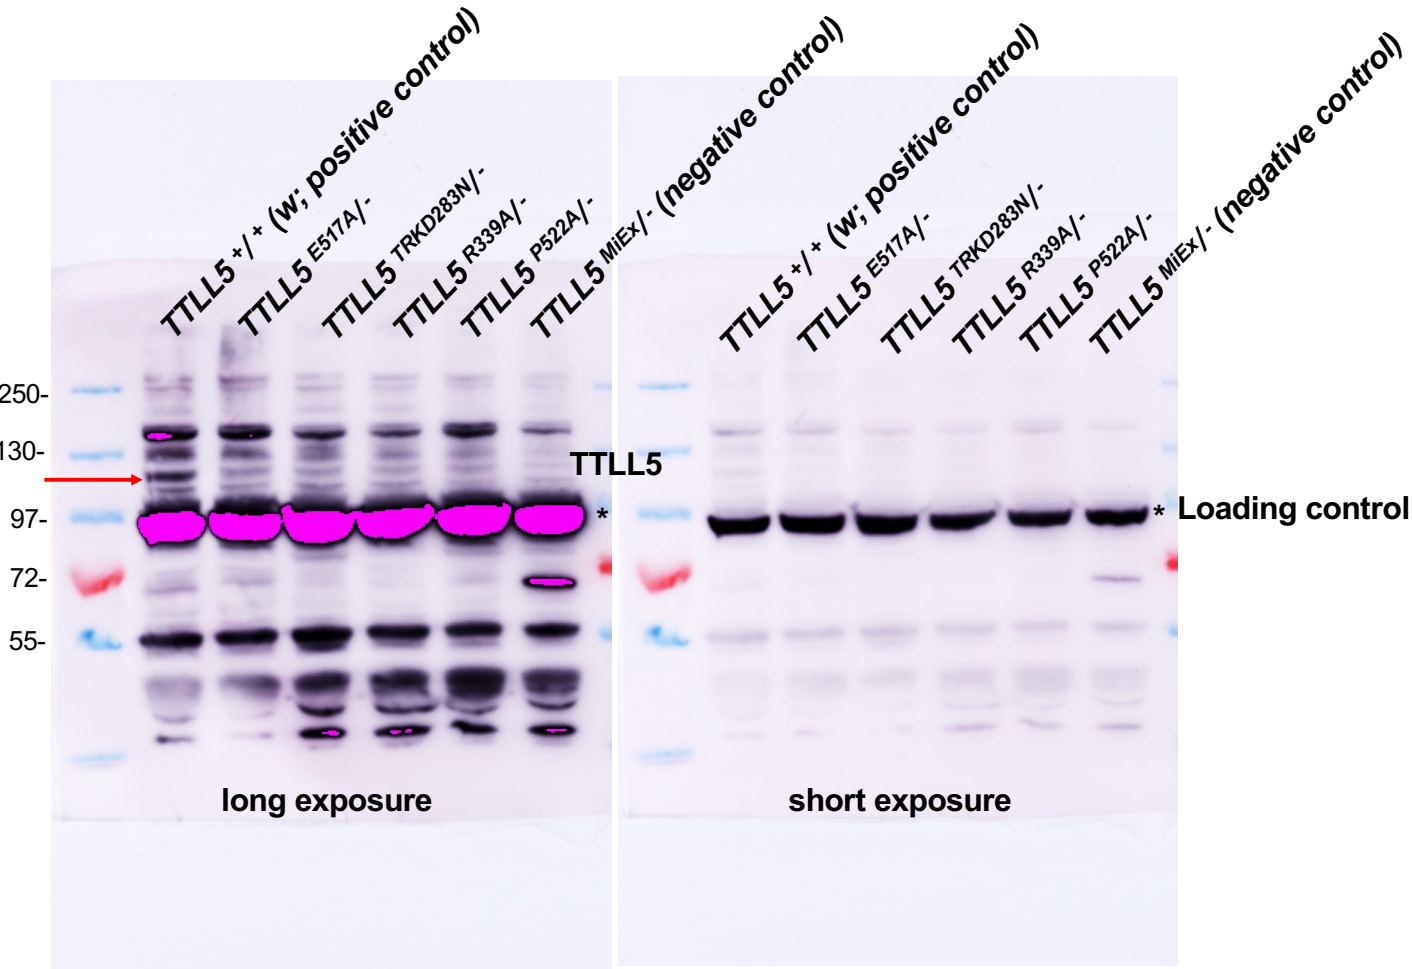

Supplement: supp [file elife-87125-supp-v1.zip]

SourceDataFIG. 3B

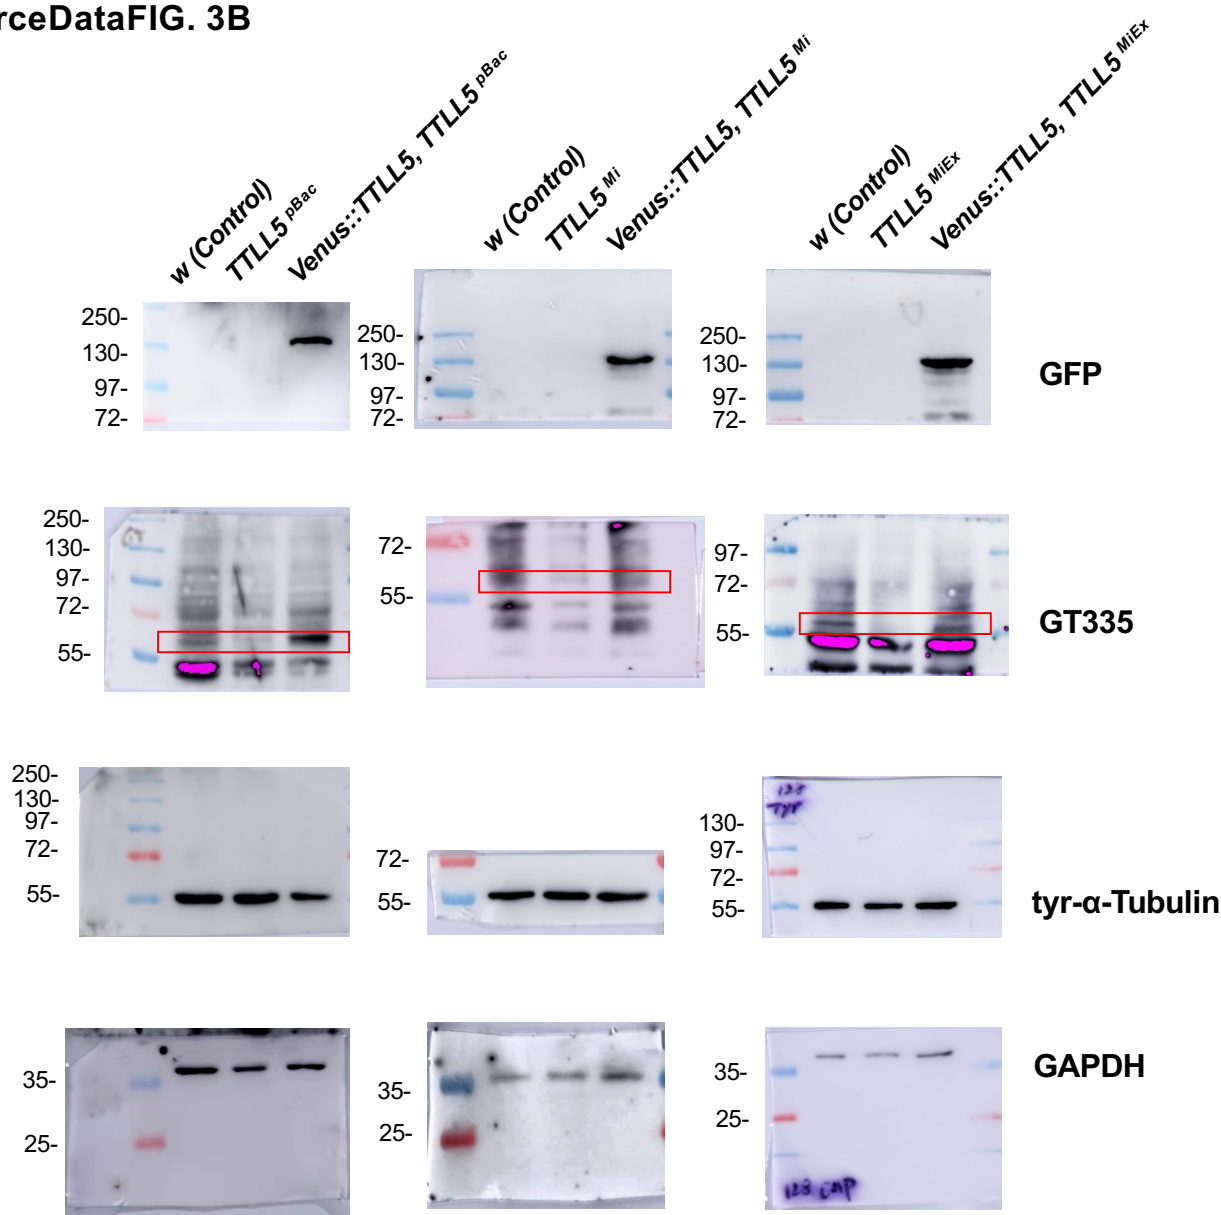

SourceDataFIG. 3D

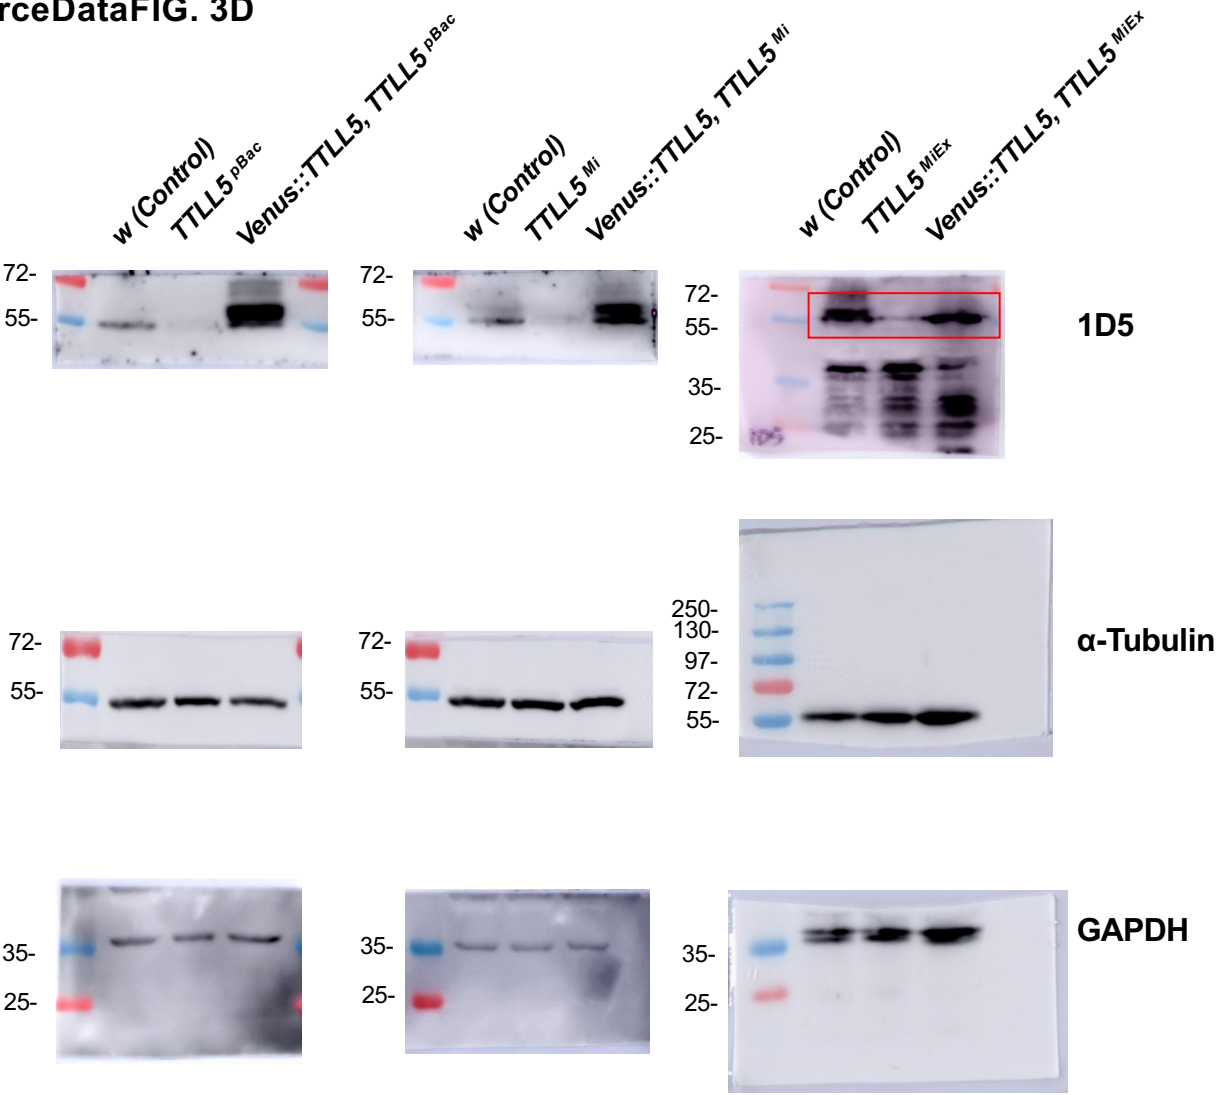

SourceDataFIG. 3F

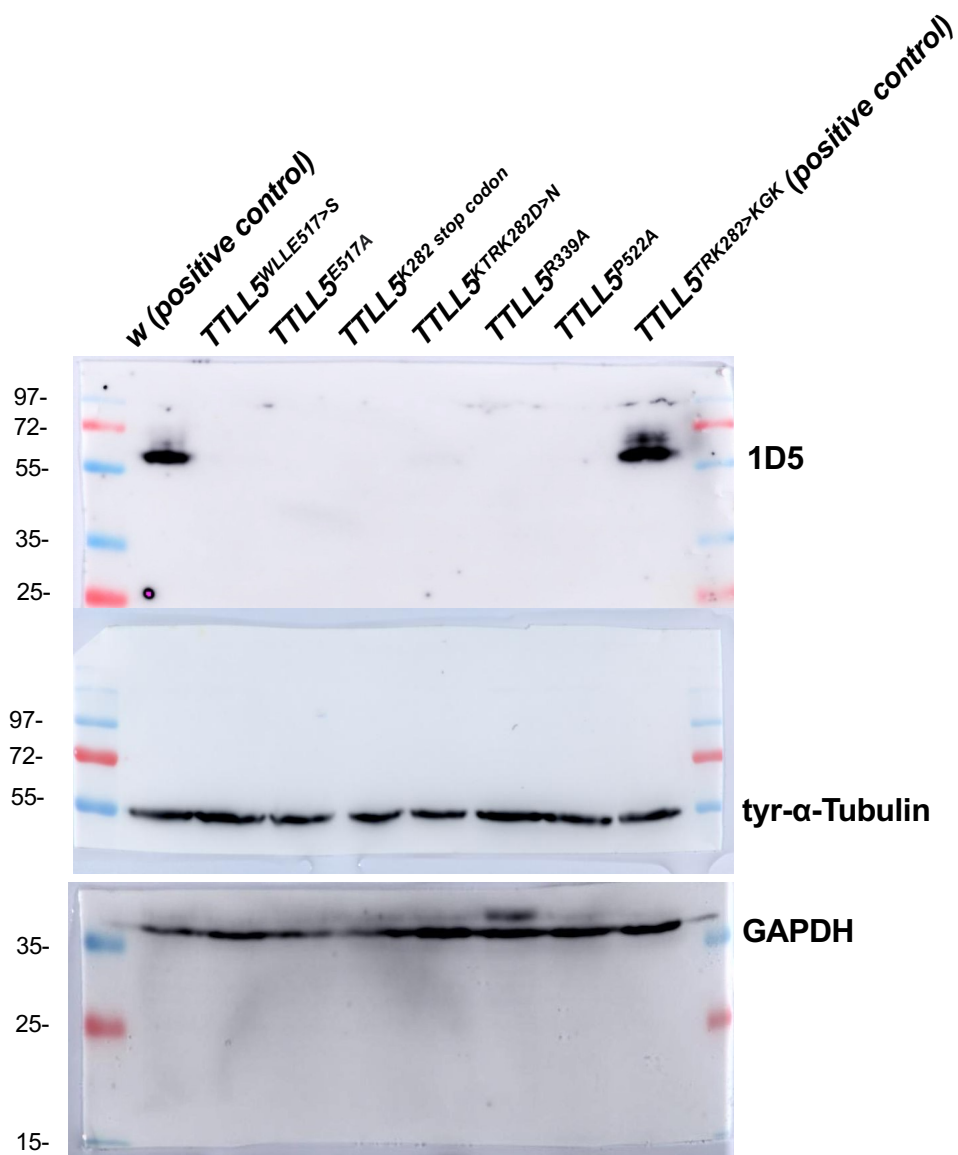

SourceDataFIG. 3G

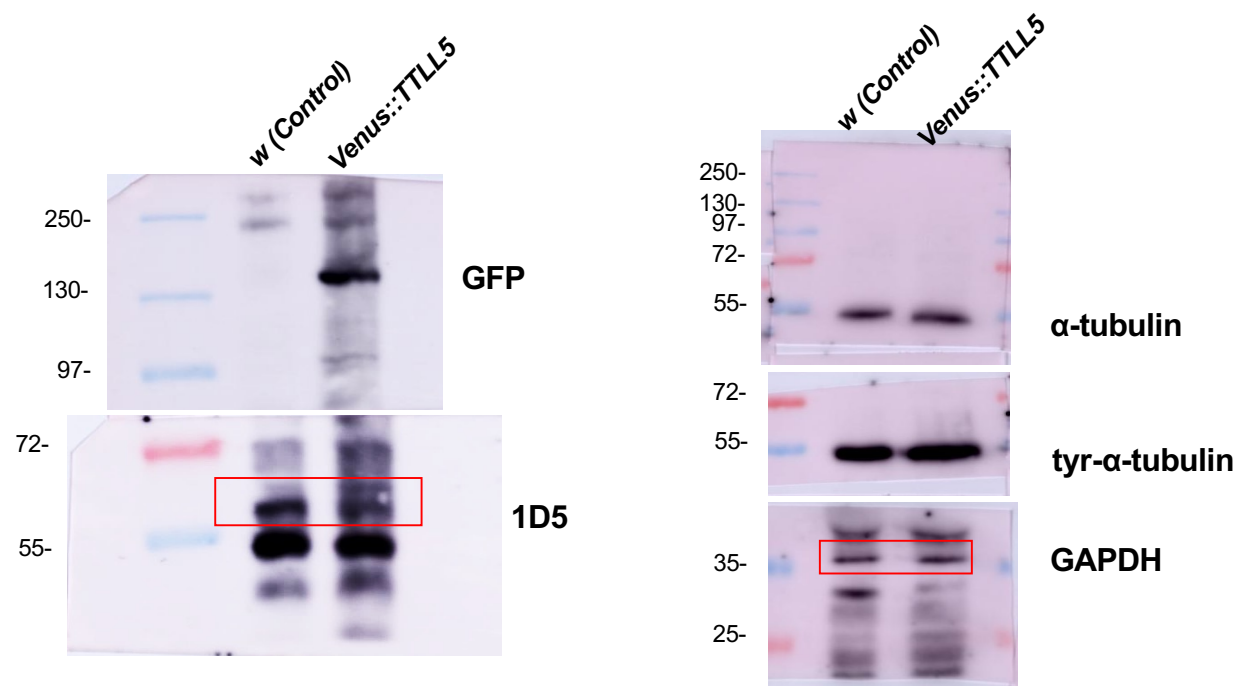

Supplement: supp [file elife-87125-supp-v1.zip]

Appendix 1 - Figure 2 - SourceData 1

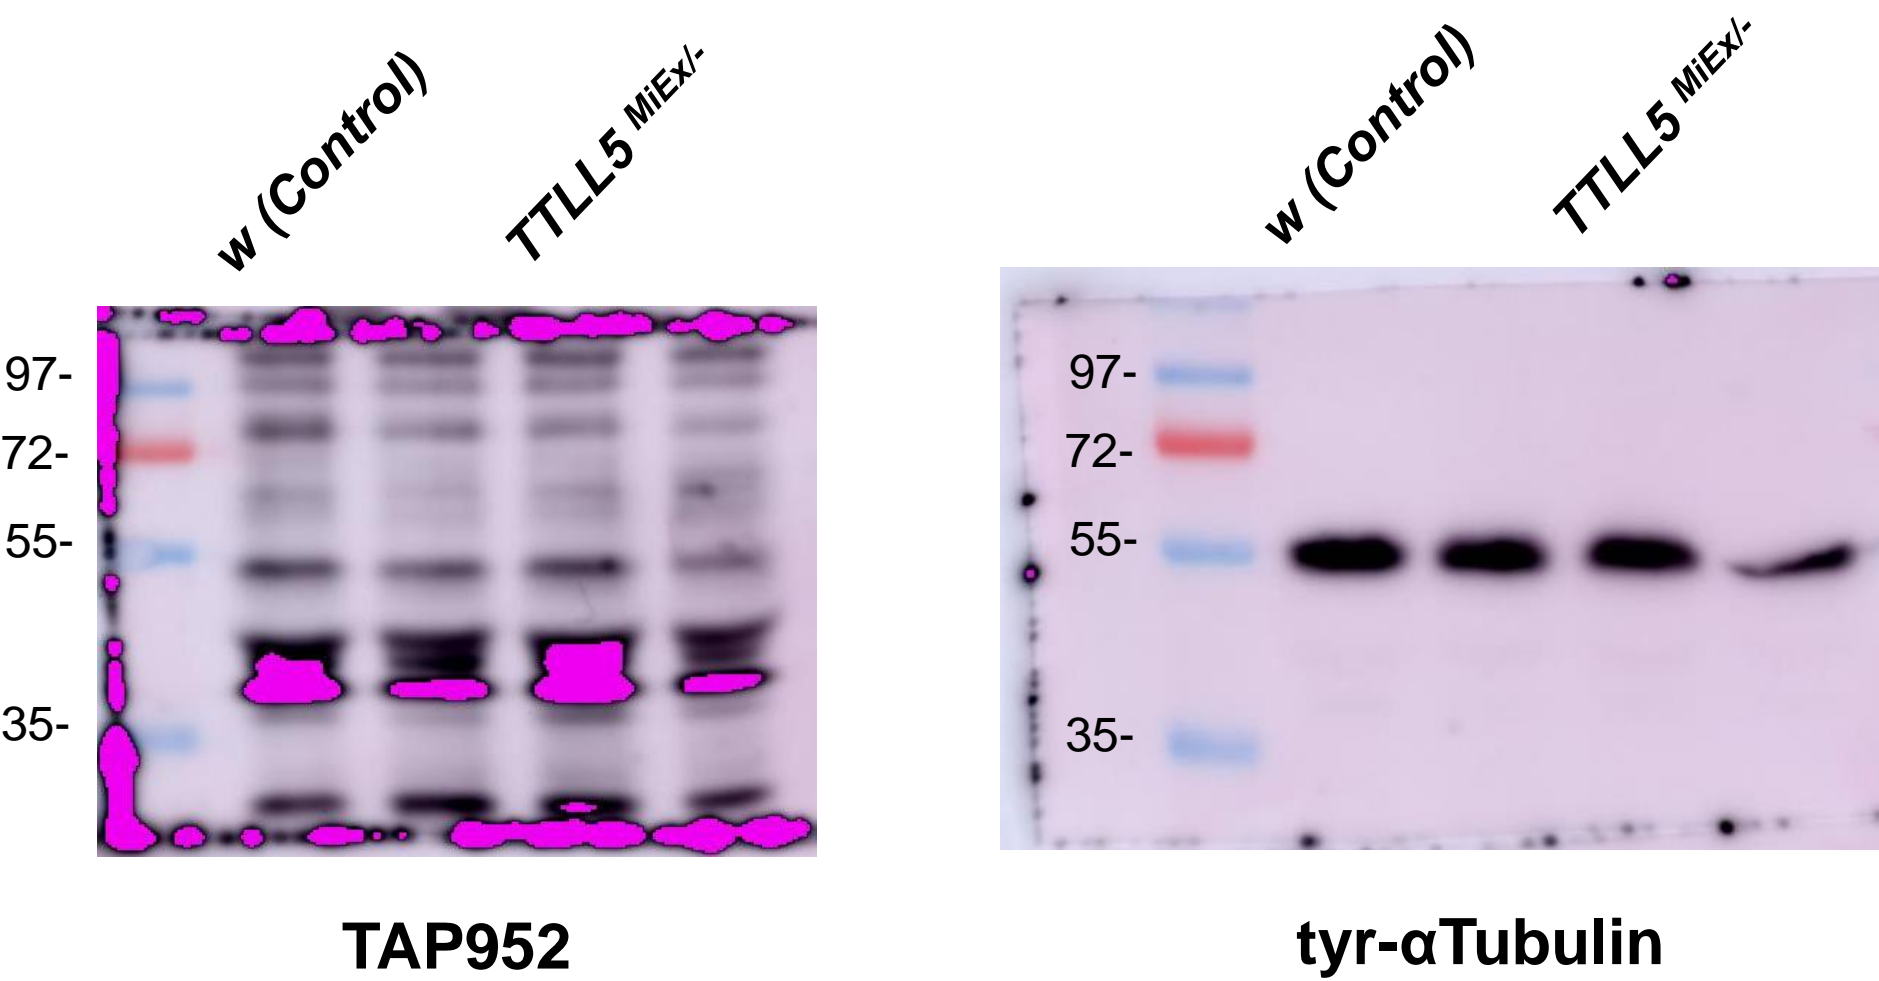

Supplement: supp [file elife-87125-supp-v1.zip]

SourceDataFIG. 7A

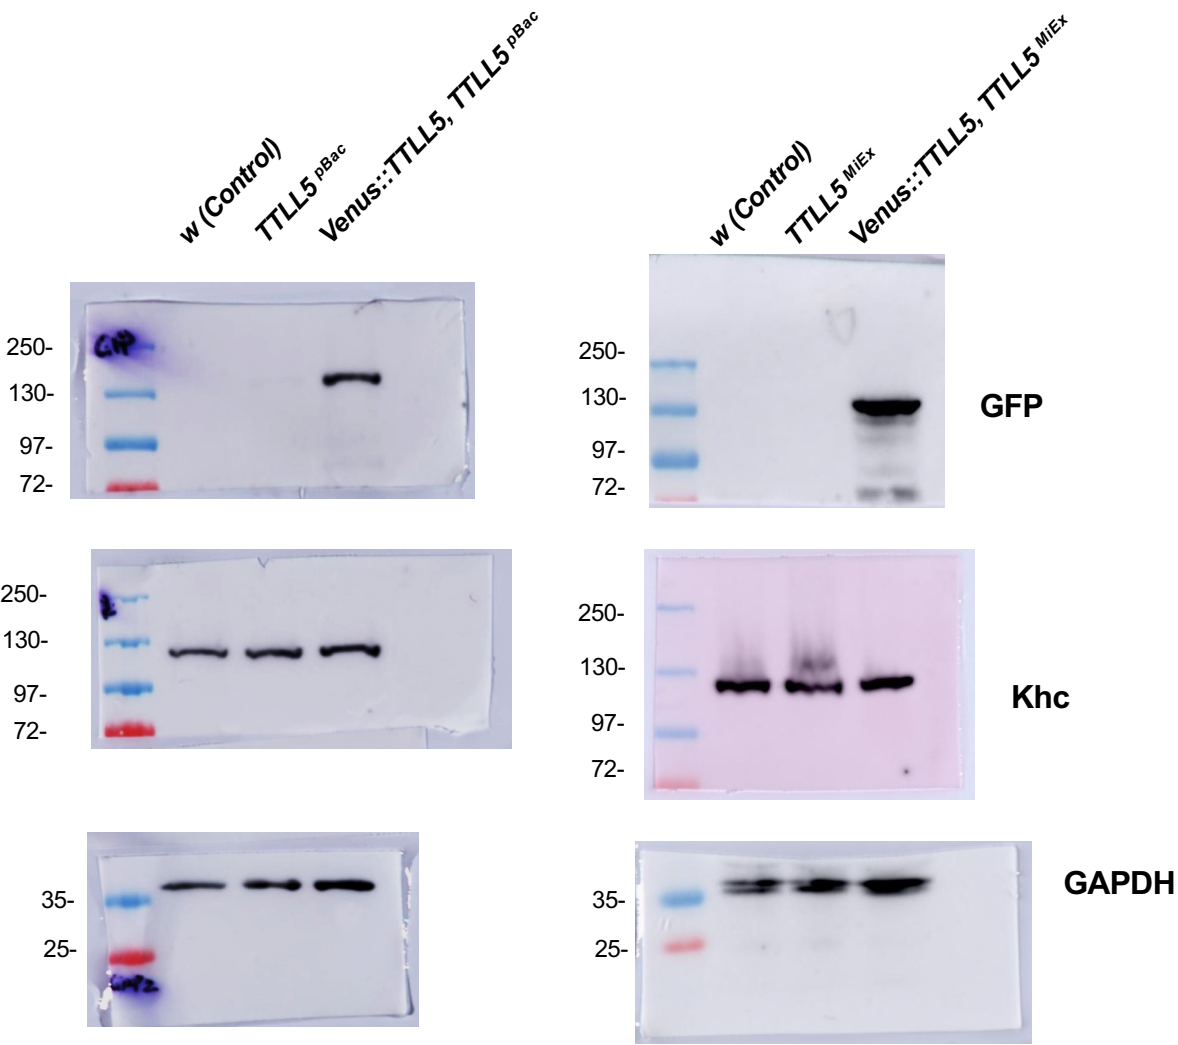

SourceDataFIG. 7B

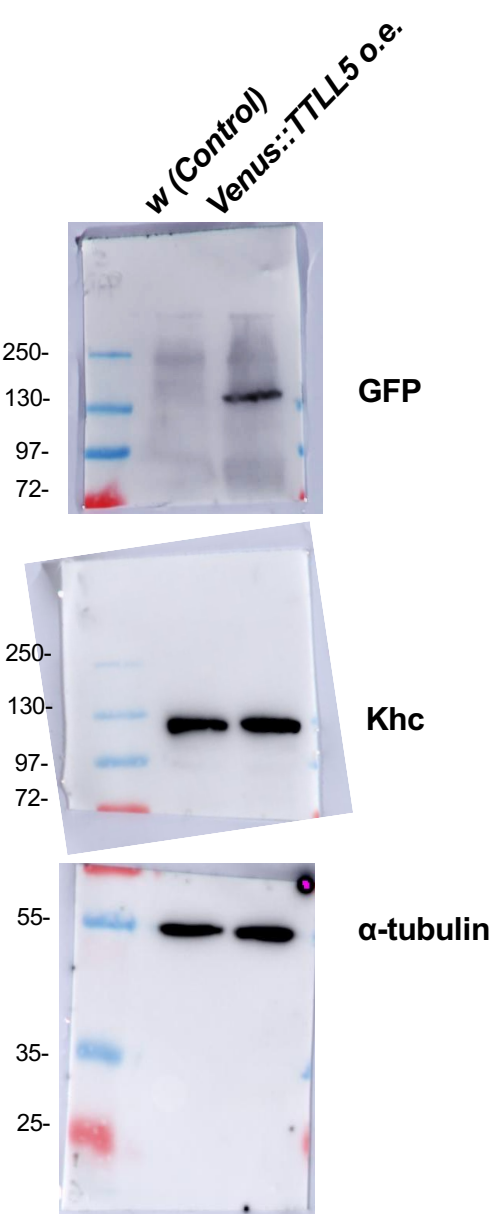

Supplement: supp [file elife-87125-supp-v1.zip]

Appendix 1 - Figure 5 - SourceData 1

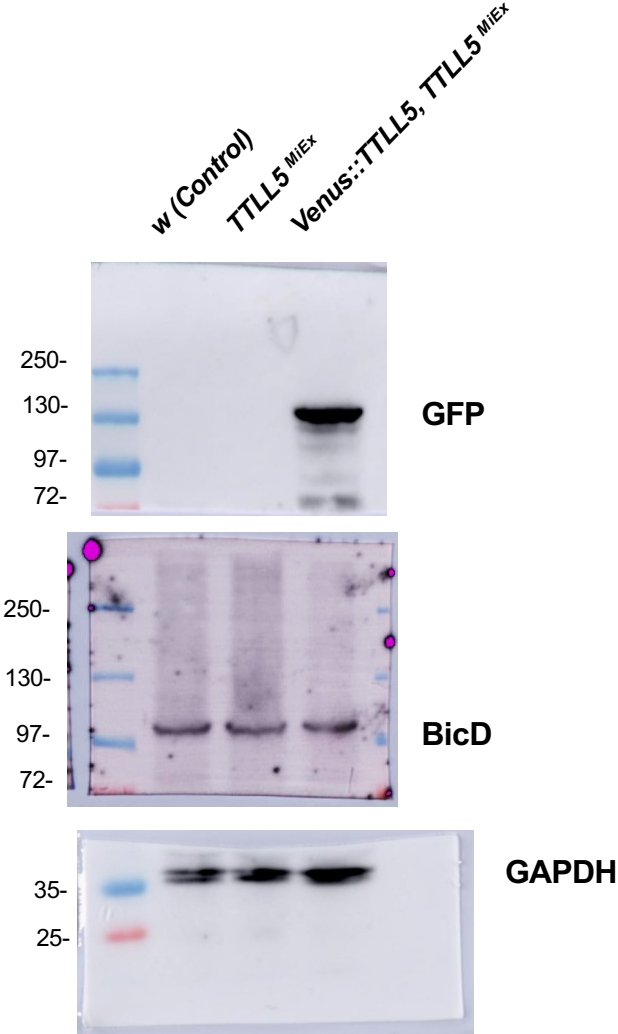

Supplement: supp [file elife-87125-supp-v1.zip]

SourceData\_FIG. 2B

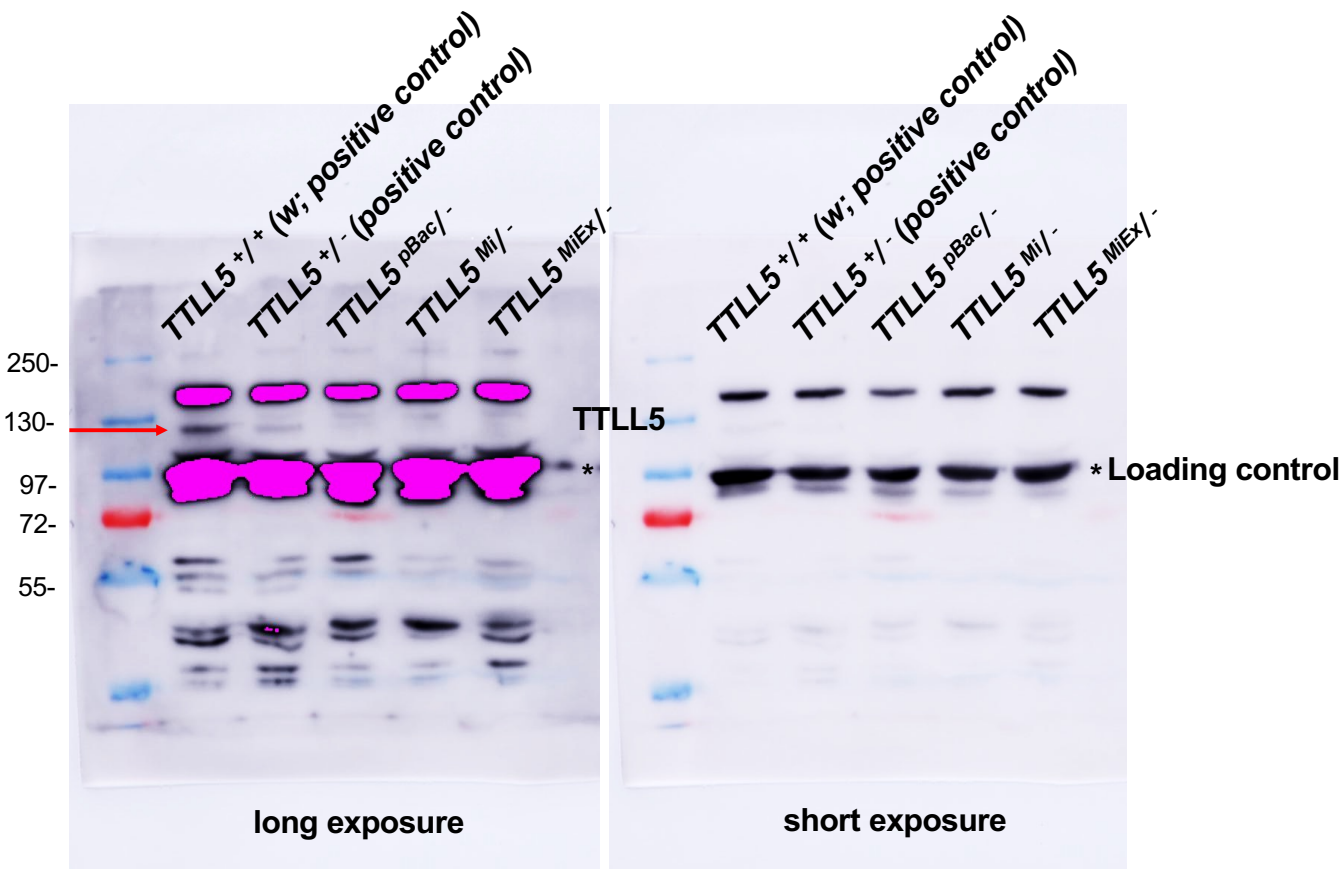

Supplement: supp [file elife-87125-supp-v1.zip]
